# Supplementary material for: Solid-state NMR evidence for the presence of two crystallographically distinct tetrahedral sites in zeolite merlinoite
Source: Royal Society of Chemistry journal article supplement (doi:10.1039/b004748l), 2000-01-01
Supplement: b004748l.doc [file b004748l.doc]

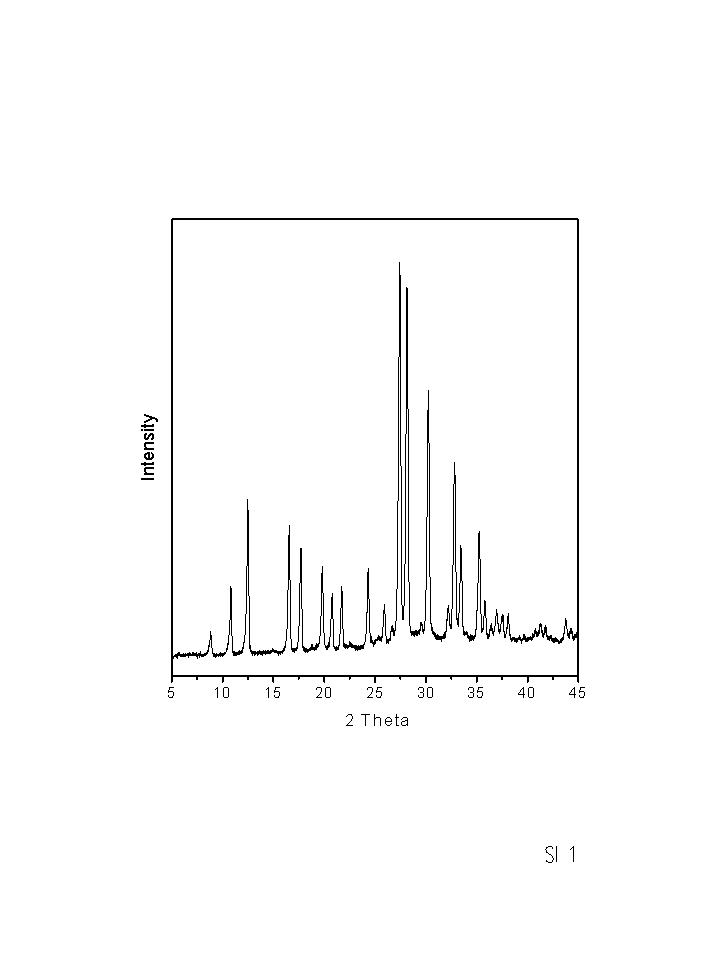
 **SI 1.** X-ray powder diffraction pattern of MER zeolite prepared here.


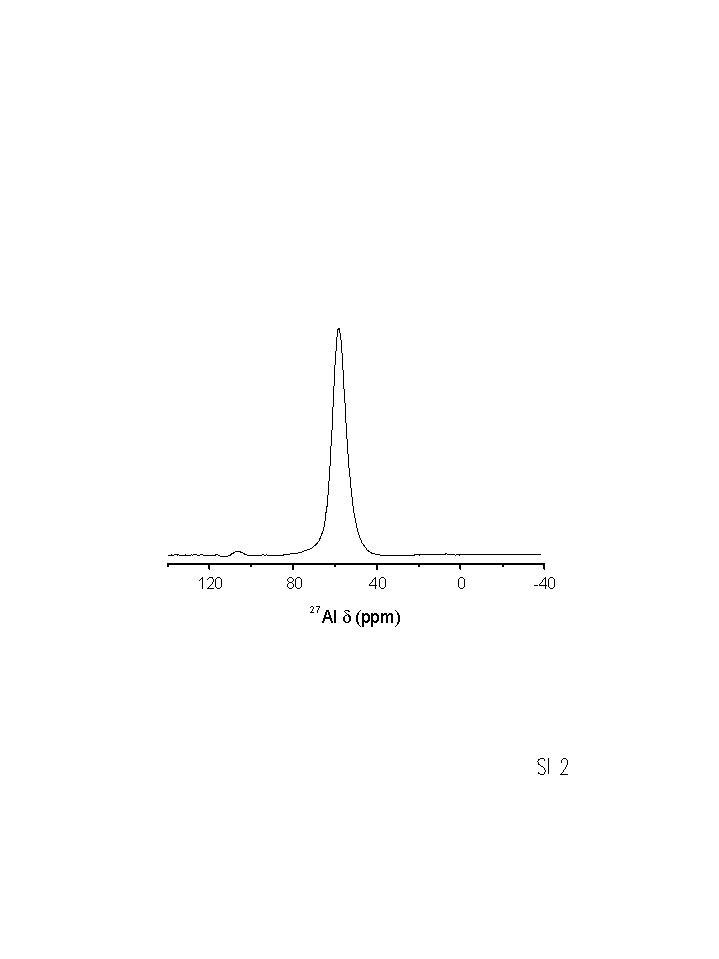
 **SI 2.** 27Al MAS NMR spectrum of MER zeolite recorded on a Varian VXR 300 at 4 kHz spinning rate, 0.1 s recycle delay, 78.164 MHz, 4 s pulse length (/12 rad), 1000 scans.
